# Supplementary material for: Synthesis, X-Ray Structure, Hirshfeld Surface Analysis, DFT Calculations, and Molecular Docking Studies of Nickel(II) Complex with Thiosemicarbazone Derivative
Source: Bioinorg Chem Appl. 2021 May 26;2021:5536902. doi: 10.1155/2021/5536902 (PMC8175184; doi:10.1155/2021/5536902)
Supplement: Supplementary Materials — Supplementary data include CIF file of the most important compounds described in this article. CCDC no. 2023702 contains supplementary crystallographic data for NiL2.. [file 5536902.f1.docx]

**Synthesis, X-ray Structure, Hirshfeld Surface Analysis, DFT Calculations and Molecular Docking studies of nickel(II) complex with thiosemicarbazone derivative**

**Uwaisulqarni M. Osman1,2, Sharmili Silvarajoo1, Muhamad Fairus Noor Hassim3, Suhana Arshad4, Ainizatul Husna Anizaim4,Fazira Ilyana Abdul Razak5**

1Faculty of Science and Marine Environment, Universiti Malaysia Terengganu,

21030 Kuala Nerus, Terengganu, Malaysia

2Advanced Nano Materials Research Group (ANOMA), Ionic State Analysis (ISA) Laboratory, Universiti Malaysia Terengganu, 21030 Kuala Nerus, Terengganu, Malaysia

3Biological Security and Sustainability (BIOSES) research group, Faculty of Science and Marine Environment, Universiti Malaysia Terengganu, 21030 Kuala Nerus, Terengganu, Malaysia

4X-ray Crystallography Unit, School of Physics, Universiti Sains Malaysia, 11800, USM Pulau Pinang, Malaysia

5Faculty of Science, Universiti Teknologi Malaysia, 81310, Skudai, Johor Bahru, Malaysia

Correspondence should be addressed to Uwaisulqarni M. Osman; [uwais@umt.edu.my](mailto:uwais@umt.edu.my)

**Figure S1.** Correlation plot for calculated and experimental bond lengths of NiL2 complex.

**Figure S2.** Correlation plot for calculated and experimental bond angles of NiL2 complex.
